# Supplementary material
Source: HighWire-hosted journal article supplement (https://erj.ersjournals.com/content/59/2/2100265)
Supplement: inline-supplementary-material-1 [file inline-supplementary-material-1.pdf]

## **Appendix 1.** Full list of authors with place of affiliation.

### **Writing Committee**

Orlando Ruben Perez Nieto MD; *Hospital General San Juan del Río, Querétaro. Intensive Care Unit.* Manuel Alberto Guerrero Gutierrez MD; *Instituto Nacional de Cancerología, Mexico City. Intensive Care Unit.* Eder Ivan Zamarron Lopez MD; *Hospital CEMAIN Tampico, Tamaulipas. Intensive Care Unit.* Ernesto Deloya Tomas MD; *Hospital General San Juan del Río, Querétaro. Head of Intensive Care Unit.* Javier Mancilla-Galindo MBBS; *Instituto Nacional de Enfermedades Respiratorias, México City. Respiratory Medicine Fellow and Instituto Nacional de Cardiología, Mexico City. Unidad de Investigación UNAM-INC.* Ashuin Kammar-García, PhD; *Instituto Nacional de Nutrición y Ciencias Médicas “Salvador Zubiran”, Mexico City. Emergency Department.* Raúl Soriano Orozco; *Hospital de Alta Especialidad T1 IMSS, León, Guanajuato. Intensive Care Unit.* Gabriel Cruz Chavez MD; *Clínica Hospital Mérida ISSSTE. Head of Intensive Care Unit.* Jose David Salmeron Gonzalez MD; *Hospital General “Miguel Silva”, Morelia, Michoacán. Intensive Care Unit.* Marco Antonio Toledo Rivera MD; *Hospital SEDNA, Mexico City. Head of Intensive Care Unit.* Luis Antonio Morgado Villaseñor MD; *Hospital General de Zona IMSS No.15 Reynosa, Tamaulipas. Intensive Care Unit.*

Jenner Jose Martínez Mazariegos MD; *Hospital Vida Mejor ISSSTECH Tuxtla Gutiérrez, Chiapas. Intensive Care Unit.* Silvio Antonio Ñamendys Sylva MD, MSc, FCCP, FCCM; *Instituto Nacional de Cancerología and Instituto Nacional de Ciencias Médicas y Nutrición “Salvador Zubirán”, Mexico City. Head of Intensive Care Unit.*

### **General Research Committee**

Diego Escarraman Martinez MD, MSc; *Centro Médico Nacional IMSS “La Raza”, Mexico City. Department of Anaesthesiology.* Miguel Angel Martinez Camacho, PT, MSc; *Hospital General de Mexico, Mexico City. Intensive Care Unit.* Ivette Mata Maqueda MD, MSc. DSc; *Secretaría de Salud del Estado de Querétaro, Ethics and Research Committee.* Jesús Salvador Sánchez Díaz MD, MSc; *Hospital de Alta Especialidad IMSS “Adolfo Ruiz Cortines” Veracruz, Veracruz. Intensive Care Unit.* Luis Alberto Macias Garcia, MD, MSc; *Hospital Regional ISSSTE “Fernando Quiroz Gutiérrez”, Mexico City. Intensive Care Unit.* Josué Luis Medina Estrada MD; *Hospital Regional No. 1 IMSS “Vicente Guerrero”, Acapulco, Guerrero. Intensive Care Unit.*

### **Local researchers**

**Hospital SEDNA, Mexico City:** *Ivette Zapata Centeno MD, Intensive Care Unit; Cecilia Hernández Fernández MD.* **Hospital General de Zona No. 33 IMSS Bahía de Banderas, Nayarit:** *Francisco Agustín Martínez Ayuso MD, Intensive Care Unit,* **Hospital General “Dr. Miguel Silva”, Morelia, Michoacán:** *José David Salmerón González MD, Intensive Care Unit.* *Juan Manuel Angeles Uribe MD, Emergency Department.* **Centro Médico Lic. Adolfo López Mateos, ISEM, Toluca, State of Mexico:** *Aaron Alacio Ávila MD, Intensive Care Unit.* *Abad*

*Quetzalcoatl Ortega Pérez MD, Head of Intensive Care Unit. Centro Medico Nacional 20 de Noviembre, ISSSTE, Mexico City: Jessica Selene Cancino Cuevas MD, Intensive Care Unit. Alberto Hilarion de la Vega Bravo MD, Head of Intensive Care Unit. Clínica Hospital Mérida ISSSTE, Mérida, Yucatán: Gabriel Cruz Sanchez MD. Clínica Hospital Mérida ISSSTE. Head of Intensive Care Unit. Hospital General Dr. Enrique Cabrera, Mexico City: Ivan Ilescas Martinez MD, Emergency Department. Lilian Saraí Ramirez Serrano MD, Emergency Department. Hospital Regional de Alta Especialidad de Zumpango, State of Mexico: Areli Patricia Ortíz Jimenez MD, Emergency Department. María José Pecero Hidalgo MD, Department of Pneumology. Hospital Estatal de Atención de Pacientes COVID-19, Leon, Guanajuato: Jorge Adalid Díaz Rodriguez MD, Respiratory Care Unit. Hospital Juárez de México, Mexico City: Juan Carlos Betancourt Aldana Villarruel MD, Department of Cardiology. José Carlos Gasca Aldama MD, Respiratory Care Unit. Ruben Nicolas Mendoza MD, Department of Cardiology. Luis Fausto García Mayen MD, Head of Cardiovascular Medicine Department. Hospital General Tuxtepec, Oaxaca: Jesús Ariben Servando Álvarez Ramirez MD, Respiratory Care Unit. Enrique Fleuvier Morales López MD. Respiratory Care Unit. Hospital General de San Juan del Río, San Juan del Río, Querétaro. Jorge López Fermin MD, Intensive Care Unit, Tania Mondragon Labelle MD, Intensive Care Unit, Gabriela Castillo Gutierrez MD, Intensive Care Unit, Jorge Daniel Carrión Moya MD, Intensive Care Unit, María Guadalupe Olvera Ramos MD. Intensive Care Unit, Manuel Alfredo Díaz Martínez, MD, Department of Anaesthesiology. Hospital Santo Tomás Querétaro, Querétaro. Cristobal Meneses Olguín MD, Head of Respiratory Care Unit, Andrea Guadalupe de la Torre Rittscher MD, Respiratory Care Unit. Lizbeth Franco Morales MD, Respiratory Care Unit. Martin de Jesus Reyna Ramirez MD, Respiratory Care Unit. Angélica Del Carmen Chimal Ayohua MD, Respiratory Care Unit. Hospital General de Zona No. 48 “San Pedro Xalpa”, Mexico City. César Daniel Alonso Bello MD, Internal Medicine Department. Edgar Pérez Barragán MD. Department of Infectiology. Hospital General de Zona No. 71 Veracruz, Veracruz. Oscar Rodrigo Jimenez Flores, Intensive Care Unit. Ulises Espinosa Hernandez MD, Emergency Department. Hospital Comunitario de Ocuilco, Morelos: Iván Hernández Bernabé MD. Internal Medicine Department. Yuliana Young Peralta MD, Emergency Department. José Ramón Arteaga Solis MD, Medical Director. Hospital General Regional No 200 Tecámac, State of Mexico: Josafat Jesús Gutierrez de la Cruz MD. Emergency Department. Unidad Médica de Alta Especialidad IMSS No. 189 “Adolfo Ruiz Cortines”: Jesús Salvador Sánchez Díaz MD, Intensive Care Unit. Xiomara García Montes MD, Emergency Department. Hospital General Regional IMSS No. 251 Metepec, State of Mexico: Carlos Mendiola Villalobos MD, Emergency Department. Alejandro Esquivel Loza MD, Internal Medicine Department. Hospital General Regional ISSSTE “Fernando Quiroz Gutiérrez”, Mexico City: María Concepción Gonzalez Belmont MD, Hospital General de Querétaro, Querétaro: Raul Arturo Gonzalez Toribio MD, Intensive Care Unit. Alicia Alejandra Rico Pérez MD, Emergency Department. ArjunaAliel Sotomayor Zavala MD, Emergency Departmen. Hospital IESS “Manuel Ygnacio Monteros”, Loja, Ecuador:*

*Tatiana Maribel Merino Mijas MD, Intensive Care Unit. Maria Eugenia Abad Guarnizo MD. Intensive Care Unit. Hospital Materno de Celaya, Guanajuato:*  
*Karen Pamela Pozos Cortes MD, Head of Intensive Care Unit. Hospital CEMAIN, Tampico, Tamaulipas: María Angelica Sánchez Cepeda, MD, Head of Intensive Care Unit. Hospital Regional No. 1 IMSS “Vicente Guerrero”, Acapulco, Guerrero: Josué Luis Medina Estrada MD. Intensive Care Unit. Hospital de la Beneficencia Española San Luis Potosí, San Luis Potosí: Luis Arturo López Reveles MD, Emergency Department. Elsa Berenice Arriaga Rivera MD, Emergency Department. Hospital General de Zona No. 1, Mexico City: Ramses Dorado García MD, Emergency Department. Angela Janeth Bustos Valdez MD, Emergency Department. Nizaguíee Cecilia Zaragoza Ortiz MD, Emergency Department. José Daniel Castañeda Casiano MD, Emergency Department. Maritssa Mabel Martínez Ramírez MD, Emergency Department. Iván Rayón Andrade MD, Emergency Department.*

### **Collaborators - monitors**

*Silvia Elena Uribe Moya MD – Centro Medico Nacional IMSS “La raza”, Hospital de Infectologia “Dr. Daniel Mendez Hernandez”, Respiratory Care Unit. Rodrigo Fernando Centeno Asencio MD – Hospital General Regional Mérida “Ignacio García Tellez”, Emergency Department. Alfredo García Tellez MD, Raymundo Montiel Latorre MD - Hospital General de Pachuca; Emergency Department. Luis Fernando Flores Zamora NUS - Hospital Regional de la Universidad de Colima, Intensive Care Unit. Dulce María Bernal Martínez MD, Victor Hugo García López MD - Hospital General de Tláhuac, Mexico City. Diego González Barbosa RT - Centro Médico Nacional de Occidente, Guadalajara, Jalisco. Department of Respiratory Physiology. Hospital Star Medica Luna Parc, Cuautitlán Izcalli, State of Mexico: Marco Antonio Villagrana Rodríguez. Intensive Care Unit.*

### **ACKNOWLEDGEMENTS**

The APRONOX Group wishes to thank Edgard Díaz Soto, Jaziel López Pérez, José Antonio Meade Aguilar, Rubén Rodríguez Blanco, José Luis Patiño Pérez, Janisia Rodríguez Solís, Maribel Santosbeña Lagunes, Alberto Calvo Zúñiga, Manuel de Jesús Santaella Sibaja, Luis Iván Contreras Ley, María Alejandra Sicsik Aragón, Yessica Bernal Luna, Carlos Baez Ambriz, Yanira Jiménez Blancas, Alejandro Ayala Mata, Tania Gabriela Ramírez Lira, Iván Avalos Flores, Edwing Díaz Rodríguez, Roberto Robles Godínez, Eduardo Espino López, Hugo Francisco Díaz Ramírez, Concepción Mendoza Fragoso, Oliver Garaz Trujillo, and Jesús Elías Paredes Flores. for their help in providing care to patients with COVID-19.

**Appendix 2.** List of hospitals participating in the study and physicians in charge

|           | <b>Name of hospital</b>                                   | <b>Institution</b> | <b>State</b>    | <b>Country</b> |
|-----------|-----------------------------------------------------------|--------------------|-----------------|----------------|
| <b>1</b>  | Hospital de Beneficencia Española                         | Private            | San Luis Potosi | Mexico         |
| <b>2</b>  | Centro Medico Luis Adolfo López Mateos                    | ISSSTE             | Mexico City     | Mexico         |
| <b>3</b>  | Centro Médico Nacional 20 de Noviembre                    | ISSSTE             | Mexico City     | Mexico         |
| <b>4</b>  | Hospital General de Zona No. 33 Bahía de Banderas         | IMSS               | Nayarit         | Mexico         |
| <b>5</b>  | Centro CEMAIN                                             | Private            | Tamaulipas      | Mexico         |
| <b>6</b>  | Hospital General Miguel Silva                             | SSA                | Michoacán       | Mexico         |
| <b>7</b>  | Clínica Hospital                                          | ISSSTE             | Mérida          | Mexico         |
| <b>8</b>  | Hospital General Dr. Enrique Cabrera                      | SSA                | Mexico City     | Mexico         |
| <b>9</b>  | Hospital Estatal de Atención COVID 19                     | SSA                | Guanajuato      | Mexico         |
| <b>10</b> | Hospital Materno de Celaya                                | SSA                | Guanajuato      | Mexico         |
| <b>11</b> | Hospital Juárez de México                                 | SSA                | Mexico City     | Mexico         |
| <b>12</b> | Hospital Santo Tomas                                      | Private            | Querétaro       | Mexico         |
| <b>13</b> | Hospital General Tuxtepec                                 | SSA                | Oaxaca          | Mexico         |
| <b>14</b> | Hospital SEDNA                                            | Private            | Mexico City     | Mexico         |
| <b>15</b> | Hospital General San Juan del Rio                         | SSA                | Querétaro       | Mexico         |
| <b>16</b> | Hospital General de Zona No. 48 San Pedro Xalpa           | IMSS               | Mexico City     | Mexico         |
| <b>17</b> | Hospital General Fernando Quiroz Gutiérrez                | ISSSTE             | Mexico City     | Mexico         |
| <b>18</b> | Hospital General Tláhuac                                  | SSA                | Mexico City     | Mexico         |
| <b>19</b> | Hospital General SESEQ                                    | SSA                | Querétaro       | Mexico         |
| <b>20</b> | Hospital General Regional No. 1 Vicente Guerrero          | IMSS               | Guerrero        | Mexico         |
| <b>21</b> | Hospital General de Zona No. 1                            | IMSS               | Mexico City     | Mexico         |
| <b>22</b> | Hospital General de Zona No. 71                           | IMSS               | Veracruz        | Mexico         |
| <b>23</b> | Hospital General Regional No. 251                         | IMSS               | Mexico City     | Mexico         |
| <b>24</b> | Hospital Manuel Ygnacio Monteros                          | IESS               | Loja            | Ecuador        |
| <b>25</b> | Unidad Médica de Alta Especialidad “Adolfo Ruiz Cortines” | IMSS               | Veracruz        | Mexico         |
| <b>26</b> | Hospital Comunitario de Ocuituco                          | SSA                | Morelos         | Mexico         |
| <b>27</b> | Hospital Rural No. 1 San Felipe Ecatepec                  | IMSS               | Chiapas         | Mexico         |

\* IMMS: Mexican Social Security Institute

\* ISSSTE: Government Workers’ Social Security and Services Institute

\* SSA: Secretariat of Health (*Secretaría de Salud*)

\* IESS: Ecuadorian Social Security Institute

**Appendix 3.** Chest CT assessment using the CO-RADS\* categorical assessments scheme to evaluate suspicion of COVID-19

| <b>Category</b>  | <b>Level of COVID-19 suspicion</b> | <b>Chest CT findings</b>                                     |
|------------------|------------------------------------|--------------------------------------------------------------|
| <b>CO-RADS 1</b> | Very low                           | Normal or non-infectious abnormalities                       |
| <b>CO-RADS 2</b> | Low                                | Abnormalities consistent with infections other than COVID-19 |
| <b>CO-RADS 3</b> | Indeterminate                      | Unclear whether COVID-19 is present                          |
| <b>CO-RADS 4</b> | High                               | Abnormalities suspicious for COVID-19                        |
| <b>CO-RADS 5</b> | Very high                          | Typical COVID-19                                             |
| <b>CO-RADS 6</b> | Proven                             | RT-PCR + for SARS-CoV-2                                      |

\*CO-RADS: COVID-19 Reporting and Data System.

**Appendix 4.** Calculation of  $\text{FiO}_2$  based on type of supplemental oxygen delivery device used.

| Oxygen therapy          | Flow (L/min)   | * $\text{FiO}_2$ (%) |
|-------------------------|----------------|----------------------|
| Nasal cannula           | 1              | 24 %                 |
|                         | 2              | 28 %                 |
|                         | 3              | 32 %                 |
|                         | 4              | 36 %                 |
|                         | 5              | 40 %                 |
|                         | 6              | 44 %                 |
| Non-rebreather mask     | 10-15          | 80-95 %              |
| High-flow nasal cannula | Flows up to 60 | *Up to 100%          |

\*  $\text{FiO}_2$ : Fraction of inspired oxygen.

## Appendix 5. Sample size calculation.

Sample size was calculated to determine the difference between two independent proportions with the formula:

$$\text{Subjects per group} = \frac{[Z_{\alpha}\sqrt{2P(1-P)} + Z_{\beta}\sqrt{P_1(1-P_1) + P_2(1-P_2)}]^2}{(P_1 - P_2)^2}$$

Where  $Z_{\alpha}$  at 95% (two-sided) was 1.96;  $Z_{\beta}$  at 90%, was 1.282;  $P_1$  was 0.23 for the number of patients with oxygen therapy who were intubated during in-hospital stay, according to Argenziano MG, et al. 2020. Considering a clinically significant reduction of 1% in the incidence of orotracheal intubation,  $P_2$  was estimated to be 0.13 for the number of patients in prone position intubated during in-hospital stay.  $P$  was the pondered measure of the two proportions, being equal to 0.18. Hence, the calculated sample size was 309 subjects per group. Calculations were performed with the G\*Power v.3.1.9.7 software.

**Appendix 6.** Density functions before and after propensity score matching of patients in the awake prone (treated) and awake supine (control) cohorts.

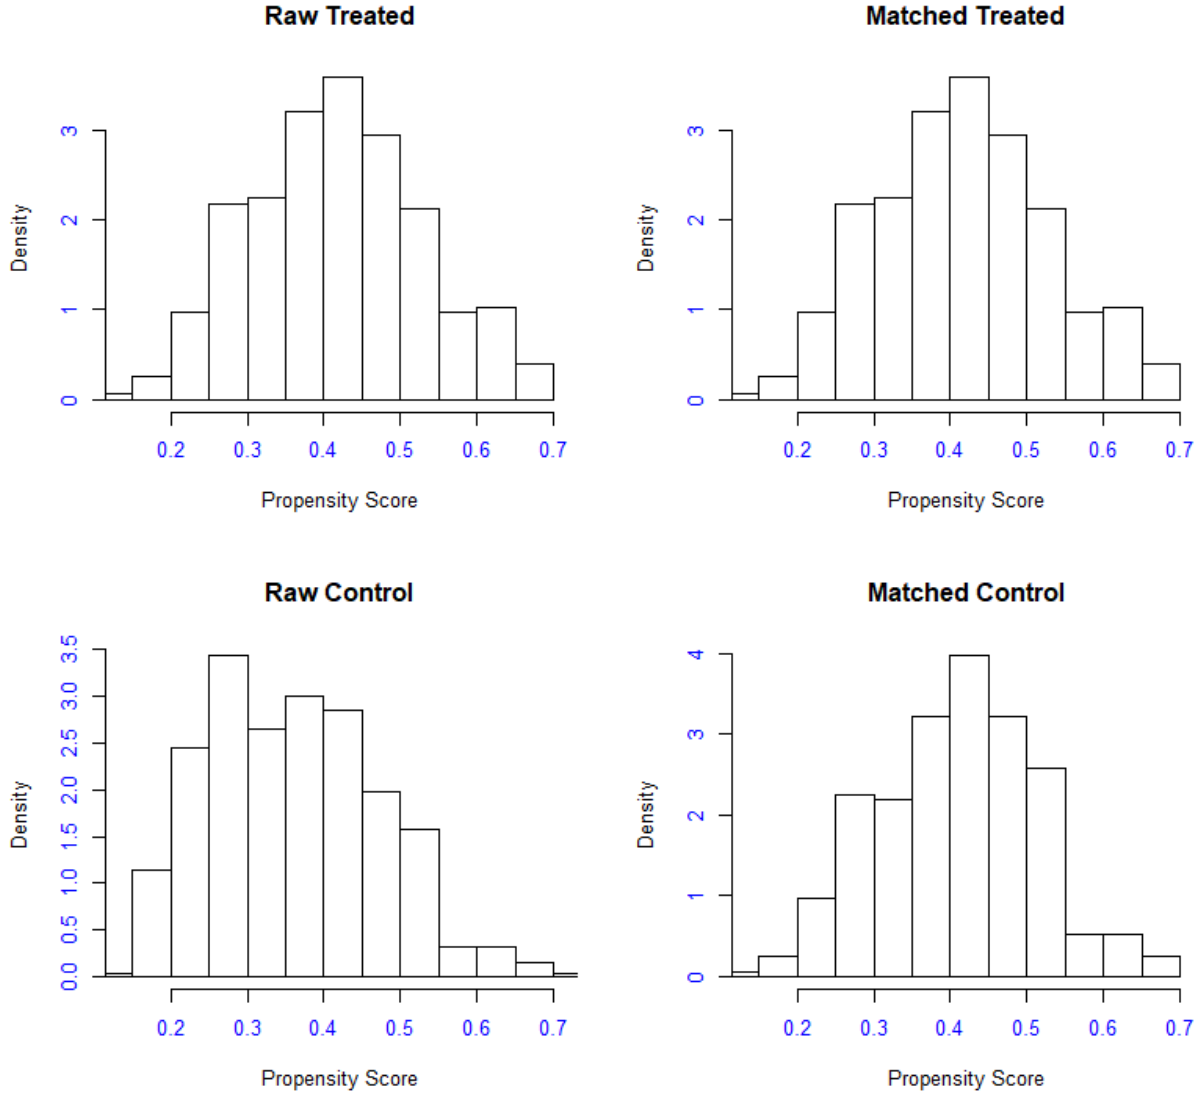



## **Appendix 7. Search strategy**

We searched MEDLINE and EMBASE through OVID, PubMed, BioRxiv and MedRxiv for research on COVID-19 published until 8 June 2021. We used the publicly available COVID-19 Living Evidence on COVID-19 dataset [32]. Search terms for the search strategy were: ('severe acute respiratory syndrome coronavirus 2' [supplementary concept] OR 'COVID-19' [supplementary concept] OR 'coronavirus' OR 'HCoV' OR 'nCoV' OR '2019 nCoV' OR 'covid' OR 'covid19' OR 'severe acute respiratory syndrome coronavirus 2' OR 'SARS-CoV-2' OR 'SARS-CoV 2' OR 'SARS coronavirus 2') AND (prone) AND (awake). The following filters were applied for study design: case series, case-control study, cohort study, trial, other, or unclassified. Studies were chosen regardless of language, provided an abstract in English was available, and if the study included and clearly differentiated patients undergoing awake prone positioning from those in awake supine position, as well as intubation rates for both groups.

**Appendix 8.** Orotracheal intubation risk and mortality risk in patients with a positive SARS-CoV-2 test (excluding patients in whom diagnostic testing was not performed) managed with awake prone positioning, adjusted for confounding variables, in both the unmatched and the propensity-score matched cohort.

|                                                                                                                                                                                                                                                                                                                                                                                                                                                                                                                                                                                                                                                                                                                                                                                                                                       | Unmatched           |         |         | Matched             |         |         |
|---------------------------------------------------------------------------------------------------------------------------------------------------------------------------------------------------------------------------------------------------------------------------------------------------------------------------------------------------------------------------------------------------------------------------------------------------------------------------------------------------------------------------------------------------------------------------------------------------------------------------------------------------------------------------------------------------------------------------------------------------------------------------------------------------------------------------------------|---------------------|---------|---------|---------------------|---------|---------|
|                                                                                                                                                                                                                                                                                                                                                                                                                                                                                                                                                                                                                                                                                                                                                                                                                                       | OR<br>(95% CI)      | p value | E-Value | OR<br>(95% CI)      | p value | E-Value |
| <b>Model for intubation<sup>a</sup></b>                                                                                                                                                                                                                                                                                                                                                                                                                                                                                                                                                                                                                                                                                                                                                                                               |                     |         |         |                     |         |         |
| Awake prone                                                                                                                                                                                                                                                                                                                                                                                                                                                                                                                                                                                                                                                                                                                                                                                                                           | 0.18<br>(0.12-0.28) | <0.0001 | 3.19    | 0.20<br>(0.12-0.32) | <0.0001 | 2.93    |
| <b>Model for mortality<sup>b</sup></b>                                                                                                                                                                                                                                                                                                                                                                                                                                                                                                                                                                                                                                                                                                                                                                                                |                     |         |         |                     |         |         |
| Awake prone                                                                                                                                                                                                                                                                                                                                                                                                                                                                                                                                                                                                                                                                                                                                                                                                                           | 0.23<br>(0.15-0.35) | <0.0001 | 2.77    | 0.23<br>(0.14-0.37) | <0.0001 | 2.67    |
| <p>a: Model adjusted for age, sex [men], ICU attention, diabetes, systemic arterial hypertension, obesity, heart disease, cancer, chronic kidney disease, pre-prone SpO<sub>2</sub>/FiO<sub>2</sub> ratio, supplemental oxygen delivery device, ceftriaxone, enoxaparin, tocilizumab, oseltamivir, and systemic steroids. Goodness of fit: Hosmer-Lemeshow <math>X^2=11.6</math>, p=0.2 AUC=0.84, 95%CI:0.81-0.88, p&lt;0.0001</p> <p>b: Model adjusted for age, sex [men], ICU attention, diabetes, systemic arterial hypertension, obesity, heart disease, pre-prone SpO<sub>2</sub>/FiO<sub>2</sub> ratio, supplemental oxygen delivery device, ceftriaxone, enoxaparin, tocilizumab, oseltamivir, and systemic steroids. Goodness of fit: Hosmer-Lemeshow <math>X^2=12.7</math>, p=0.1 AUC=0.80, 95%CI:0.77-0.84, p&lt;0.0001</p> |                     |         |         |                     |         |         |

**Appendix 9.** Funnel Plot

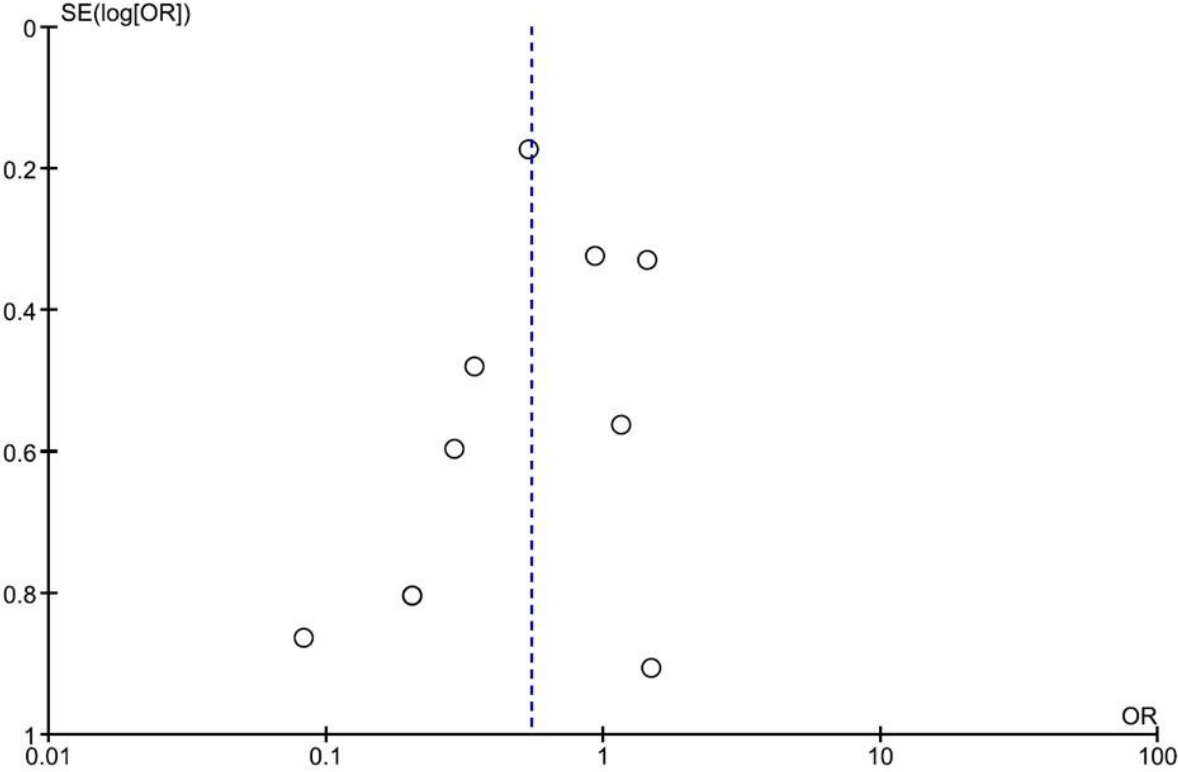

**Abbreviations**

PaO<sub>2</sub>: partial arterial pressure of oxygen, SpO<sub>2</sub>: peripheral arterial oxygen saturation, PaO<sub>2</sub>/FiO<sub>2</sub>: arterial partial pressure of oxygen /fraction of inspired oxygen, PaCO<sub>2</sub>: arterial partial pressure of carbon dioxide, RR: respiratory rate, NIV: non-invasive ventilation, HFNC: high-flow nasal cannula, ARDS: Acute respiratory distress syndrome, COVID-19: coronavirus disease, STROBE: Strengthening the Reporting of Observational studies in Epidemiology, AP: awake prone, CO-RADS: COVID-19 Reporting and Data System, IQR: interquartile range, SD: standard deviation, OR: odds ratio, CI: confidence interval, Ppl: pleural pressure, TPP: Transpulmonary pressure, V/Q: ventilation-perfusion.
